# Supplementary material
Source: ML conference proceedings conference paper supplement (https://openaccess.thecvf.com/content/CVPR2026/html/Peng_OmniVGGT_Omni-Modality_Driven_CVPR_2026_paper.html)
Supplement: Supplementary file 1 [file Peng_OmniVGGT_Omni-Modality_Driven_CVPR_2026_supplemental.pdf]

# OmniVGGT: Omni-Modality Driven Visual Geometry Grounded Transformer

## Supplementary Material

### A. Appendix

#### A.1. Dataset Details

We train our model on 19 datasets that contain a diverse range of scene types, including: ARKitScenes [12], BlendMVS [73], DL3DV [34], Dynamic Replica [23], HyperSim [49], Kubric [15], MapFree [2], MegaDepth [32], Matterport 3D [46], MVS-Synth [20], ScanNet [10], ScanNet++ [74], Spring [39], TartanAir [68], UASOL [5], Unreal 4K [60], Virtual KITTI [7], Waymo [58], WildRGBD [70]. We modified the official DUST3R [67] dataloader script to adapt it for the VGGT [65] training process. Table 8 summarizes the statistics of the datasets we used. During training, in each epoch, we sample a fixed total number of samples from the training datasets, with their proportions indicated by the “ratio” column in the table. Note that the number of images may differ from the full official release.

#### A.2. More Implementation details

**Training Objective.** In OmniVGGT, all input images, together with the available camera parameters and depth maps (if provided), are fed into the network  $\mathcal{G}$ , which predicts in an end-to-end manner the 3D point maps, complete camera poses, intrinsics, depth maps, and their corresponding confidence maps:

$$\mathcal{G}(\mathbf{I}, \mathbf{C}, \mathbf{D}) = (\hat{C}_i, \hat{P}_i, \hat{D}_i, \hat{Y}_i)_{i=1}^N \quad (9)$$

The training objectives of OmniVGGT consist of three components: camera, depth, and point map.

$$\mathcal{L} = \mathcal{L}_{\text{camera}} + \mathcal{L}_{\text{depth}} + \mathcal{L}_{\text{pmap}}, \quad (10)$$

The camera loss  $\mathcal{L}_{\text{camera}}$  supervises the cameras  $\hat{\mathbf{g}}_i$  with ground truth  $\mathbf{g}_i$  using L1 loss:

$$\mathcal{L}_{\text{camera}} = \sum_{i=1}^N \|\hat{\mathbf{g}}_i - \mathbf{g}_i\|_1 \quad (11)$$

Following VGGT, we apply a confidence-aware regression loss to the depth and point map, both along with a gradient-based term:

$$\mathcal{L}_{\text{depth}} = \sum_{i=1}^N \left\| \Sigma_i^D \odot (\hat{D}_i - D_i) \right\| + \left\| \Sigma_i^D \odot (\nabla \hat{D}_i - \nabla D_i) \right\| - \alpha \log \Sigma_i^D \quad (12)$$

$$\mathcal{L}_{\text{pmap}} = \sum_{i=1}^N \left\| \Sigma_i^P \odot (\hat{P}_i - P_i) \right\| + \left\| \Sigma_i^P \odot (\nabla \hat{P}_i - \nabla P_i) \right\| - \alpha \log \Sigma_i^P \quad (13)$$

where  $\odot$  is the channel-broadcast element-wise product and  $\alpha$  is a hyper-parameter. In addition, our depth  $D$ , point map  $P$ , and camera translations  $t$  in ground truths are all normalized by dividing the average Euclidean distance of all 3D points in the point map  $P$  to the origin. It should be noted that this normalization process is different from the normalization used in the information injection stage of OmniVGGT.

**Frame Sampling Strategy.** For every batch, we select between 2 and 24 frames from multiple random training scenes while maintaining a constant total of 24 frames within each batch. We sample each batch of images based on camera pose similarity. For each frame, all other frames are ranked according to their pose similarity, and the top  $N$  most similar frames are selected as its valid range. Then, for each sequence, we randomly choose one frame as the anchor frame and sample the remaining frames from its valid range. In addition, our depth  $D$ , point map  $P$ , and camera translations  $t$  in ground truths are all normalized by dividing the average Euclidean distance of all 3D points in the point map  $P$  to the origin. It should be noted that this normalization process is different from the normalization used in the information injection stage.

**Training Details.** We initialize OmniVGGT by using pre-trained weights from VGGT and fine-tune for 10 epochs of 12M iterations each. We train the model using the AdamW optimizer with a learning rate of  $2 \times 10^{-5}$  for prediction heads and  $1 \times 10^{-5}$  for backbone, which incorporates a 5K step linear warmup and cosine weight decay schedule. The  $p$  in our training objective is set to 10%. The spatial resolutions of the input images, depth maps, and point maps range from  $(518 \times 168)$  to  $(518 \times 518)$ . We also use ColorJitter as the data augmentation to enhance the model’s robustness in varying lighting conditions.

#### A.3. Baselines.

We mainly compare our approach with VGGT, Pow3R [21], and DUST3R [67]. Both Pow3R and DUST3R are feed-forward models that take a pair of views as input. The distinctive feature of Pow3R is that it can additionally incor-

Table 8. **Training datasets statistic.** Each training epoch is composed of 20 datasets, and their relative quantities are reported as a ratio.

| Index | Dataset              | Scene Type | Real/Synthetic | Dynamic | # of Frames | Training Prob (%) |
|-------|----------------------|------------|----------------|---------|-------------|-------------------|
| 1     | ARKitScene [12]      | Indoor     | Real           | Static  | 1.2M        | 2.07              |
| 2     | BlendedMVS [73]      | Mixed      | Real           | Static  | 1.1M        | 2.07              |
| 3     | DL3DV [34]           | Mixed      | Real           | Static  | 21M         | 17.81             |
| 4     | Dynamic Replica [23] | Indoor     | Synthetic      | Dynamic | 2.8M        | 4.68              |
| 5     | HyperSim [49]        | Indoor     | Synthetic      | Static  | 70K         | 3.55              |
| 6     | Kubric [15]          | Object     | Synthetic      | Dynamic | 1.3M        | 1.67              |
| 7     | MapFree [2]          | Outdoor    | Real           | Static  | 2.6M        | 9.03              |
| 8     | MegaDepth [32]       | Outdoor    | Real           | Static  | 1.2M        | 2.07              |
| 9     | Matterport 3D [46]   | Indoor     | Real           | Static  | 1.9M        | 3.48              |
| 10    | MVS-Synth [20]       | Outdoor    | Synthetic      | Static  | 12K         | 1.34              |
| 11    | ScanNet [10]         | Indoor     | Real           | Static  | 23M         | 4.75              |
| 12    | ScanNet++ [74]       | Indoor     | Real           | Static  | 7.8M        | 13.88             |
| 13    | Spring [39]          | Outdoor    | Synthetic      | Dynamic | 4.9K        | 0.5               |
| 14    | Tartanair [68]       | Mixed      | Synthetic      | Static  | 3M          | 9.36              |
| 15    | Uasol [5]            | Outdoor    | Real           | Static  | 1.3M        | 2.41              |
| 16    | Unreal 4K [60]       | Outdoor    | Synthetic      | Static  | 16K         | 1.81              |
| 17    | Vkitti [7]           | Outdoor    | Synthetic      | Dynamic | 42K         | 3.44              |
| 18    | Waymo [58]           | Outdoor    | Real           | Dynamic | 7.9M        | 8.36              |
| 19    | WildRGBD [70]        | Object     | Real           | Static  | 1.9M        | 4.35              |

porate camera intrinsics, poses, and depth maps as auxiliary inputs, but only in a pairwise input.

#### A.4. More Results of Auxiliary Information Guidance

In this subsection, we present the performance of auxiliary information guidance on additional datasets. Tables 9 and 10 report the results on ARKitScene [12] and OmniWorld (Game) [80], respectively. The methods have not been trained on these datasets.

#### A.5. Full Results of Multi-View Depth Estimation

In this subsection, we present the complete results of the multi-view depth evaluation in Section 5.2. For OmniVGGT, all images are resized to a fixed width of 518 pixels, and the aspect ratio is adjusted to the closest aspect ratio used during training according to the original images. The reported results are averaged over all samples. As shown in Table 11, we further analyze the impact of injecting different percentages of depth information. We observe that both VGGT and OmniVGGT show relatively poor Rel performance on the ScanNet dataset, mainly because the ground-truth depth in ScanNet is noisy (e.g., walls and floors are not smooth). Although the predicted depth maps are visually reasonable, the quantitative metrics appear degraded.

#### A.6. More Results of 3D Reconstruction

In this subsection, we present the complete 3D reconstruction results. Table 12 and 13 report the benchmark results on the 7-Scenes [55] and NRGB [3] datasets, respectively,

including the effects of incorporating different types and percentages of auxiliary information.

#### A.7. More Visualizations

Fig. 7 presents a visual comparison between OmniVGGT and other methods on the 7-Scenes[55], NRGBD[56], and ETH3D [53] datasets. With the assistance of additional modality inputs (e.g., camera poses), OmniVGGT maintains accurate spatial relationships even in extreme cases—such as when two images have no overlap at all. Fig. 9 further demonstrates the strong generalization ability of OmniVGGT on in-the-wild data, where it achieves impressive results across both synthetic-engine-rendered and AI-generated images. Fig. 10 illustrates the reconstruction performance on image pairs that contain limited or no overlap between views. We also show the rollout examples of our method on the CALVIN benchmark in Fig. 11.

#### A.8. Architecture Ablation

In this subsection, we investigate the impact of different GeoAdapter strategies on model performance. We randomly select 100 batches from the Sintel [6] dataset, with 10 images per scene for inference, and evaluate the related metrics for depth and camera estimation. We trained the following three additional versions under the same training parameters and dataset. We experiment with three strategies: (a) *Replace*, where the original camera tokens are directly replaced by auxiliary camera tokens in each AA block, (b) *One-Layer Adapter*, where auxiliary camera tokens are only injected once before the AA blocks, and (c)

Table 9. **Impact of Auxiliary Information Injection on ARKitScenes (unseen)** [12]. We also show in green the absolute improvement w.r.t. the results without auxiliary information. The best results in each category are **bold**.

| Method                         | Aux. information (%) |        | Depth                 |                          | Camera                |                       |                       |
|--------------------------------|----------------------|--------|-----------------------|--------------------------|-----------------------|-----------------------|-----------------------|
|                                | Depth                | Camera | Abs Rel↓              | $\delta < 1.25 \uparrow$ | RRA@5°↑               | RTA@ 5°↑              | AUC@30° ↑             |
| VGGT                           | ✗                    | ✗      | 0.048                 | 98.90                    | 72.17                 | 35.94                 | 60.52                 |
| <b>OmniVGGT</b>                | ✗                    | ✗      | <b>0.035</b>          | <b>99.02</b>             | <b>73.66</b>          | <b>50.03</b>          | <b>65.82</b>          |
| OmniVGGT +<br>aux. information | 30                   | ✗      | 0.035 (+0.000)        | 99.57 (+0.55)            | 77.53 (+3.87)         | 50.59 (+0.56)         | 67.92 (+2.10)         |
|                                | 50                   | ✗      | 0.029 (+0.006)        | 99.52 (+0.50)            | 77.62 (+3.96)         | 51.97 (+1.94)         | <b>68.50 (+2.68)</b>  |
|                                | 70                   | ✗      | 0.021 (+0.014)        | 99.57 (+0.55)            | <b>76.34 (+2.68)</b>  | 53.15 (+3.12)         | 68.25 (+2.43)         |
|                                | 100                  | ✗      | <b>0.006 (+0.029)</b> | <b>99.97 (+0.95)</b>     | 74.59 (+0.93)         | <b>53.69 (+3.66)</b>  | 67.99 (+2.17)         |
|                                | ✗                    | 30     | 0.035 (+0.000)        | 99.31 (+0.29)            | 77.60 (+3.94)         | 51.40 (+1.37)         | 68.46 (+2.64)         |
|                                | ✗                    | 50     | 0.035 (+0.000)        | 99.30 (+0.28)            | 79.69 (+6.03)         | 53.92 (+3.89)         | 70.69 (+4.87)         |
|                                | ✗                    | 70     | 0.034 (+0.001)        | 99.28 (+0.26)            | 84.69 (+11.03)        | 56.59 (+6.56)         | 74.21 (+8.39)         |
|                                | ✗                    | 100    | <b>0.034 (+0.001)</b> | <b>99.89 (+0.87)</b>     | <b>91.20 (+17.54)</b> | <b>64.98 (+14.95)</b> | <b>81.64 (+15.82)</b> |
|                                | 100                  | 100    | <b>0.006 (+0.029)</b> | <b>99.97 (+0.95)</b>     | <b>90.19 (+16.53)</b> | <b>67.00 (+16.97)</b> | <b>81.91 (+16.09)</b> |

Table 10. **Impact of Auxiliary Information Injection on OmniWorld-Game (unseen)** [80]. We also show in green the absolute improvement w.r.t. the results without auxiliary information. The best results in each category are **bold**.

| Method                         | Aux. information (%) |        | Depth                 |                          | Camera               |                      |                       |
|--------------------------------|----------------------|--------|-----------------------|--------------------------|----------------------|----------------------|-----------------------|
|                                | Depth                | Camera | Abs Rel↓              | $\delta < 1.25 \uparrow$ | RRA@5°↑              | RTA@ 5°↑             | AUC@30° ↑             |
| VGGT [65]                      | ✗                    | ✗      | 0.260                 | 79.10                    | 73.97                | 58.57                | 63.75                 |
| <b>OmniVGGT</b>                | ✗                    | ✗      | <b>0.240</b>          | <b>80.50</b>             | <b>74.20</b>         | <b>59.39</b>         | <b>63.86</b>          |
| OmniVGGT +<br>aux. information | 30                   | ✗      | 0.208 (+0.032)        | 87.28 (+6.78)            | 74.42 (+0.22)        | 59.57 (+0.18)        | 63.91 (+0.05)         |
|                                | 50                   | ✗      | 0.178 (+0.062)        | 90.68 (+10.18)           | 74.38 (+0.18)        | 59.48 (+0.09)        | 63.98 (+0.12)         |
|                                | 70                   | ✗      | 0.151 (+0.089)        | 92.23 (+11.73)           | <b>74.63 (+0.43)</b> | 59.82 (+0.43)        | 64.20 (+0.34)         |
|                                | 100                  | ✗      | <b>0.095 (+0.145)</b> | <b>94.54 (+14.04)</b>    | 74.31 (+0.11)        | <b>60.54 (+1.15)</b> | <b>64.87 (+1.01)</b>  |
|                                | ✗                    | 30     | 0.239 (+0.001)        | 80.50 (+0.00)            | 74.29 (+0.09)        | 60.70 (+1.31)        | 64.75 (+0.89)         |
|                                | ✗                    | 50     | 0.238 (+0.002)        | 80.51 (+0.01)            | 74.37 (+0.17)        | 61.93 (+2.54)        | 65.48 (+1.62)         |
|                                | ✗                    | 70     | 0.237 (+0.003)        | 80.51 (+0.01)            | 74.42 (+0.22)        | 64.15 (+4.76)        | 68.06 (+4.20)         |
|                                | ✗                    | 100    | <b>0.237 (+0.003)</b> | <b>80.52 (+0.02)</b>     | <b>77.91 (+3.71)</b> | <b>65.46 (+6.07)</b> | <b>71.91 (+8.05)</b>  |
|                                | 100                  | 100    | <b>0.094 (+0.146)</b> | <b>94.57 (+14.07)</b>    | <b>79.43 (+5.23)</b> | <b>68.89 (+9.50)</b> | <b>74.35 (+10.49)</b> |

*Depth ZeroConv*, where a ZeroConv layer is used for depth information injection. Table 14 reports the full results of our ablation experiments.

In addition, Fig. 8 illustrates the feature maps of the spatial tokens and auxiliary depth tokens in OmniVGGT, with and without the use of the depth ZeroConv. We use Principal Component Analysis (PCA) to reduce the high-dimensional token embeddings to three dimensions and save them as RGB images. We observe that when the ZeroConv layer is applied to depth injection, the meaningful information within the auxiliary depth features (e.g., edges and background structures) is largely suppressed, causing the network to treat the injected depth as noise. In this case, the feature representations of OmniVGGT with and without auxiliary depth inputs remain nearly identical, and the resulting performance shows almost no difference. Therefore, we chose not to include the depth ZeroConv in our final network design.

## B. Comparison with MapAnything

We have conducted direct comparisons using the official MapAnything [24] model on our benchmarks. As reported in Table. 15 (Sintel) and Table. 16 (CO3D), OmniVGGT outperforms MapAnything in camera pose estimation when no auxiliary information is provided. When auxiliary depth or camera inputs are available, OmniVGGT achieves comparable performance to MapAnything. Furthermore, in the object-centric domain, OmniVGGT consistently and substantially outperforms MapAnything across all evaluated settings, demonstrating that OmniVGGT remains highly competitive and effective.

Table 11. **Multi-view Depth Evaluation.** (Parentheses) denote training on data from the same domain. K”, “RT”, and “D” denote intrinsic, relative pose, and depth information, respectively. The best and second best results are **bold** and underlined respectively.

| Method                           | GT    | Extra | ScanNet [10]   |                 | ETH3D [53] |             | DTU [1]    |             | T&T [27]   |             | Average    |             |
|----------------------------------|-------|-------|----------------|-----------------|------------|-------------|------------|-------------|------------|-------------|------------|-------------|
|                                  | range | info  | rel↓           | $\tau$ ↑        | rel↓       | $\tau$ ↑    | rel↓       | $\tau$ ↑    | rel↓       | $\tau$ ↑    | rel↓       | $\tau$ ↑    |
| COLMAP [51, 52] (K+RT)           | ×     | ×     | 14.6           | 34.2            | 16.4       | 55.1        | 0.7        | 96.5        | 2.7        | 95.0        | 8.6        | 70.2        |
| COLMAP Dense [51, 52] K+RT       | ×     | ×     | 38.0           | 22.5            | 89.8       | 23.2        | 20.8       | 69.3        | 25.7       | 76.4        | 43.6       | 47.9        |
| MVSNet [72] (K+RT)               | ✓     | ×     | 22.7           | 20.9            | 21.6       | 35.6        | (1.8)      | (86.7)      | 6.5        | 74.6        | 12.3       | 11.1        |
| Vis-MVSNet [76] (K+RT)           | ✓     | ×     | 8.9            | 33.5            | 10.8       | 43.3        | 1.8        | 87.4        | 4.1        | 7.2         | 6.4        | 42.9        |
| MVS-Former++ (K+RT)              | ✓     | ×     | 15.2           | 21.9            | 21.4       | 32.5        | (1.2)      | (91.9)      | 7.6        | 71.5        | 10.8       | 8.5         |
| CER-MVS [9] (K+RT)               | ×     | ×     | 21.1           | 24.3            | 11.7       | 47.5        | 4.1        | 71.3        | 6.4        | 82.1        | 10.8       | 56.3        |
| DUST3R [67]                      | ×     | med   | (3.1)          | (71.8)          | 3.0        | 76.0        | 3.9        | 68.6        | 3.3        | 75.1        | 3.3        | 72.9        |
| Pow3R [21]                       | ×     | med   | (3.2)          | (68.8)          | 3.0        | 74.7        | 3.0        | 74.3        | 3.3        | 76.6        | 3.1        | 73.6        |
| VGGT [65]                        | ×     | med   | (3.7)          | (70.0)          | 1.7        | 87.2        | 0.9        | 95.4        | 1.7        | 90.6        | 2.0        | 85.8        |
| <b>OmniVGGT</b>                  | ×     | med   | (3.6)          | (72.3)          | 1.8        | 87.5        | 1.1        | 93.9        | 1.8        | 90.0        | 2.1        | 85.9        |
| Pow3R [21] w/ 100% (K+RT)        | ×     | med   | (3.1)          | (71.4)          | 2.8        | 77.1        | 1.5        | 91.1        | 3.2        | 78.2        | 2.7        | 79.5        |
| <b>OmniVGGT w/ 100% (K+RT)</b>   | ×     | med   | (3.7)          | (72.2)          | 1.8        | 87.8        | 1.2        | 93.6        | 1.8        | 89.9        | 2.1        | 85.9        |
| <b>OmniVGGT w/ 30% D</b>         | ×     | med   | (2.3)          | (85.5)          | 0.7        | 97.9        | 0.5        | 99.2        | 1.2        | 93.2        | 1.2        | 94.0        |
| <b>OmniVGGT w/ 50% D</b>         | ×     | med   | (2.3)          | (85.9)          | 0.6        | 98.6        | 0.4        | 99.4        | 1.0        | 94.4        | 1.1        | 94.6        |
| <b>OmniVGGT w/ 70% D</b>         | ×     | med   | (2.3)          | (86.0)          | 0.6        | 98.7        | 0.4        | 99.4        | 0.9        | 95.5        | 1.1        | <u>94.9</u> |
| <b>OmniVGGT w/ 100% D</b>        | ×     | med   | ( <u>2.3</u> ) | (85.6)          | <u>0.5</u> | <u>98.7</u> | <u>0.3</u> | <b>99.5</b> | <u>0.9</u> | <u>95.5</u> | <u>1.0</u> | 94.8        |
| <b>OmniVGGT w/ 100% (K+RT+D)</b> | ×     | med   | ( <b>2.2</b> ) | ( <b>86.7</b> ) | <b>0.5</b> | <b>98.7</b> | <b>0.3</b> | <u>99.4</u> | <b>0.9</b> | <b>95.6</b> | <b>1.0</b> | <b>95.1</b> |

Table 12. **3D reconstruction on the 7-scenes [55] datasets.** K”, “RT”, and “D” denote intrinsic, relative pose, and depth information, respectively. The best and second best results in each category are **bold** and underlined respectively.

| Method                           | Acc↓         |              | Comp↓        |              | NC↑          |              |
|----------------------------------|--------------|--------------|--------------|--------------|--------------|--------------|
|                                  | Mean         | Med.         | Mean         | Med.         | Mean         | Med.         |
| VGGT [65]                        | <b>0.087</b> | 0.039        | <b>0.091</b> | 0.039        | <b>0.787</b> | <b>0.890</b> |
| Fast3R [71]                      | 0.164        | 0.108        | 0.163        | 0.080        | 0.686        | 0.775        |
| DUST3R-GA [67]                   | 0.146        | 0.077        | 0.181        | 0.067        | 0.736        | 0.839        |
| MAS3R-GA [30]                    | 0.185        | 0.081        | 0.180        | 0.069        | 0.701        | 0.792        |
| MonST3R-GA [77]                  | 0.248        | 0.185        | 0.266        | 0.167        | 0.672        | 0.759        |
| Spann3R [62]                     | 0.298        | 0.226        | 0.205        | 0.112        | 0.650        | 0.730        |
| SLAM3R [35]                      | 0.287        | 0.155        | 0.226        | 0.066        | 0.644        | 0.720        |
| CUT3R [66]                       | 0.126        | 0.047        | 0.154        | 0.031        | 0.727        | 0.834        |
| <b>OmniVGGT</b>                  | 0.104        | <b>0.037</b> | <u>0.112</u> | <b>0.031</b> | <u>0.763</u> | <u>0.875</u> |
| <b>OmniVGGT w/ 30% D</b>         | 0.098        | 0.034        | 0.110        | 0.028        | 0.778        | 0.889        |
| <b>OmniVGGT w/ 50% D</b>         | 0.103        | 0.033        | 0.106        | 0.028        | 0.781        | 0.890        |
| <b>OmniVGGT w/ 70% D</b>         | 0.094        | 0.045        | 0.094        | 0.033        | 0.785        | 0.885        |
| <b>OmniVGGT w/ 100% D</b>        | 0.085        | 0.034        | 0.085        | 0.027        | <u>0.789</u> | <u>0.894</u> |
| <b>OmniVGGT w/ 30% (K+RT)</b>    | 0.100        | 0.034        | 0.107        | 0.027        | 0.761        | 0.875        |
| <b>OmniVGGT w/ 50% (K+RT)</b>    | 0.101        | 0.035        | 0.108        | 0.027        | 0.761        | 0.875        |
| <b>OmniVGGT w/ 70% (K+RT)</b>    | 0.089        | 0.022        | 0.096        | 0.022        | 0.771        | 0.886        |
| <b>OmniVGGT w/ 100% (K+RT)</b>   | <u>0.037</u> | <u>0.017</u> | <u>0.049</u> | <u>0.019</u> | 0.778        | 0.893        |
| <b>OmniVGGT w/ 100% (K+RT+D)</b> | <b>0.036</b> | <b>0.017</b> | <b>0.036</b> | <b>0.017</b> | <b>0.810</b> | <b>0.912</b> |

Table 13. **3D reconstruction on the NRGB [3] datasets.** K”, “RT”, and “D” denote intrinsic, relative pose, and depth information, respectively. The best and second best results in each category are **bold** and underlined respectively.

| Method                           | Acc↓         |              | Comp↓        |              | NC↑          |              |
|----------------------------------|--------------|--------------|--------------|--------------|--------------|--------------|
|                                  | Mean         | Med.         | Mean         | Med.         | Mean         | Med.         |
| VGGT [65]                        | <b>0.087</b> | 0.039        | <b>0.091</b> | 0.039        | <b>0.787</b> | <b>0.890</b> |
| Fast3R [71]                      | 0.164        | 0.108        | 0.163        | 0.080        | 0.686        | 0.775        |
| DUST3R-GA [67]                   | 0.146        | 0.077        | 0.181        | 0.067        | 0.736        | 0.839        |
| MAS3R-GA [30]                    | 0.185        | 0.081        | 0.180        | 0.069        | 0.701        | 0.792        |
| MonST3R-GA [77]                  | 0.248        | 0.185        | 0.266        | 0.167        | 0.672        | 0.759        |
| Spann3R [62]                     | 0.298        | 0.226        | 0.205        | 0.112        | 0.650        | 0.730        |
| SLAM3R [35]                      | 0.287        | 0.155        | 0.226        | 0.066        | 0.644        | 0.720        |
| CUT3R [66]                       | 0.126        | 0.047        | 0.154        | 0.031        | 0.727        | 0.834        |
| <b>OmniVGGT</b>                  | 0.104        | <b>0.037</b> | <u>0.112</u> | <b>0.031</b> | <u>0.763</u> | <u>0.875</u> |
| <b>OmniVGGT w/ 30% D</b>         | 0.098        | 0.034        | 0.110        | 0.028        | 0.778        | 0.889        |
| <b>OmniVGGT w/ 50% D</b>         | 0.103        | 0.033        | 0.106        | 0.028        | 0.781        | 0.890        |
| <b>OmniVGGT w/ 70% D</b>         | 0.094        | 0.045        | 0.094        | 0.033        | 0.785        | 0.885        |
| <b>OmniVGGT w/ 100% D</b>        | 0.085        | 0.034        | 0.085        | 0.027        | <u>0.789</u> | <u>0.894</u> |
| <b>OmniVGGT w/ 30% (K+RT)</b>    | 0.100        | 0.034        | 0.107        | 0.027        | 0.761        | 0.875        |
| <b>OmniVGGT w/ 50% (K+RT)</b>    | 0.101        | 0.035        | 0.108        | 0.027        | 0.761        | 0.875        |
| <b>OmniVGGT w/ 70% (K+RT)</b>    | 0.089        | 0.022        | 0.096        | 0.022        | 0.771        | 0.886        |
| <b>OmniVGGT w/ 100% (K+RT)</b>   | <u>0.037</u> | <u>0.017</u> | <u>0.049</u> | <u>0.019</u> | 0.778        | 0.893        |
| <b>OmniVGGT w/ 100% (K+RT+D)</b> | <b>0.036</b> | <b>0.017</b> | <b>0.036</b> | <b>0.017</b> | <b>0.810</b> | <b>0.912</b> |

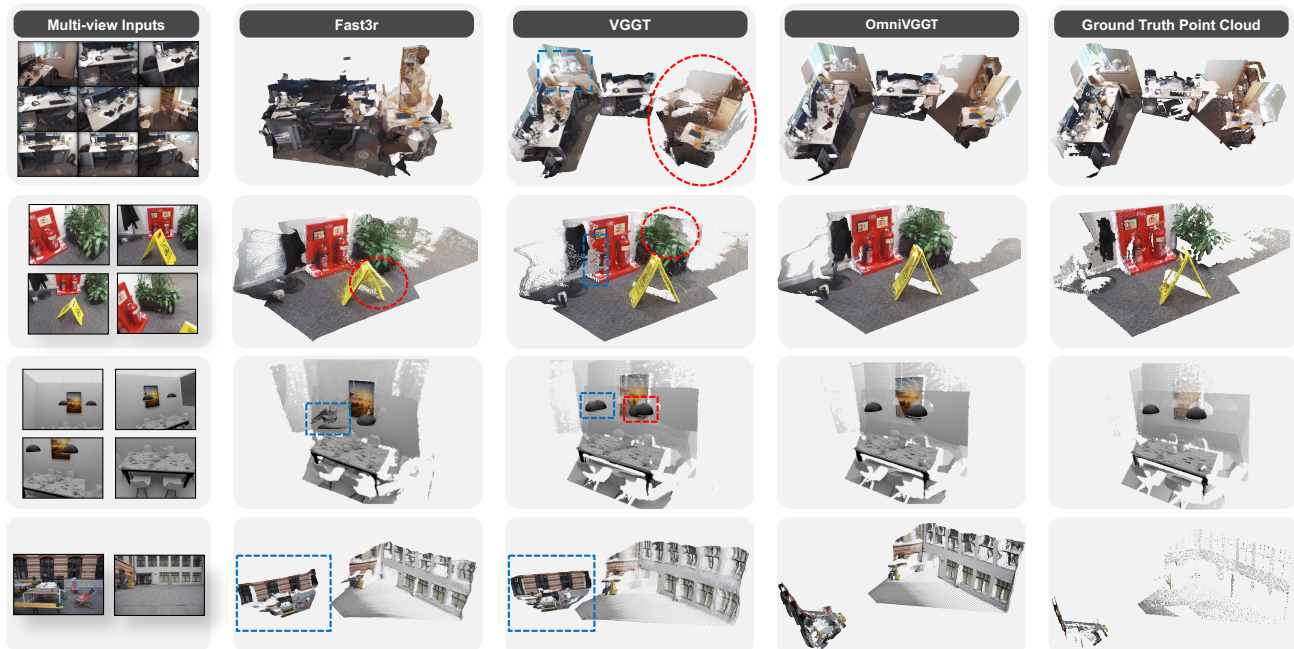

Figure 7. Visual Comparisons on 7-Scenes [55], NRGBD [3], and ETH3D [53] datasets.

Table 14. Ablation of GeoAdapter architectures. We compare different GeoAdapter designs on the Sintel [6] dataset. The ‘Replace’ refers to directly substituting the original camera tokens with auxiliary camera tokens, whereas ‘One-Layer GeoAdapter’ represents injecting auxiliary camera tokens only once before the encoder. ‘Depth ZeroConV’ denotes using ZeroConV for depth injection.

| Architecture                              | Depth                |                          | Camera                  |                         |                          |
|-------------------------------------------|----------------------|--------------------------|-------------------------|-------------------------|--------------------------|
|                                           | Abs Rel $\downarrow$ | $\delta < 1.25 \uparrow$ | RRA@5 $^\circ \uparrow$ | RTA@5 $^\circ \uparrow$ | AUC@30 $^\circ \uparrow$ |
| <i>w/o (K+RT+D) Auxiliary Information</i> |                      |                          |                         |                         |                          |
| (a) Replace                               | 0.845                | 64.74                    | 93.40                   | 30.88                   | 64.74                    |
| (b) One-Layer Adapter                     | 0.604                | 68.74                    | 96.78                   | 44.92                   | 68.74                    |
| (c) Depth ZeroConV                        | 0.569                | 70.71                    | 96.44                   | 51.86                   | 69.70                    |
| (d) OmniVGGT                              | <b>0.558</b>         | <b>71.46</b>             | 96.15                   | <b>54.01</b>            | <b>70.83</b>             |
| <i>w/ (K+RT) Auxiliary Information</i>    |                      |                          |                         |                         |                          |
| (a) Replace                               | 0.842                | 65.11                    | 96.98                   | 55.66                   | 76.28                    |
| (b) One-Layer Adapter                     | 0.563                | 70.16                    | 97.54                   | 58.84                   | 77.00                    |
| (c) Depth ZeroConV                        | 0.569                | 70.71                    | 99.65                   | 69.29                   | 83.18                    |
| (d) OmniVGGT                              | <b>0.553</b>         | <b>72.36</b>             | <b>99.97</b>            | <b>75.83</b>            | <b>85.35</b>             |
| <i>w/ Depth Auxiliary Information</i>     |                      |                          |                         |                         |                          |
| (a) Replace                               | 0.670                | 82.96                    | 94.69                   | 52.04                   | 71.61                    |
| (b) One-Layer Adapter                     | 0.107                | 85.91                    | 95.97                   | 52.34                   | 74.66                    |
| (c) Depth ZeroConV                        | 0.570                | 71.02                    | 95.45                   | 56.10                   | 72.93                    |
| (d) OmniVGGT                              | <b>0.106</b>         | <b>85.95</b>             | <b>96.93</b>            | <b>59.73</b>            | <b>77.16</b>             |
| <i>w/ (K+RT+D) Auxiliary Information</i>  |                      |                          |                         |                         |                          |
| (a) Replace                               | 0.655                | 82.96                    | 97.08                   | 57.61                   | 77.83                    |
| (b) One-Layer Adapter                     | 0.133                | 85.65                    | 99.97                   | 60.89                   | 81.66                    |
| (c) Depth ZeroConV                        | 0.505                | 71.11                    | 99.72                   | 71.66                   | 84.12                    |
| (d) OmniVGGT                              | <b>0.106</b>         | <b>85.95</b>             | <b>99.97</b>            | <b>76.33</b>            | <b>85.99</b>             |

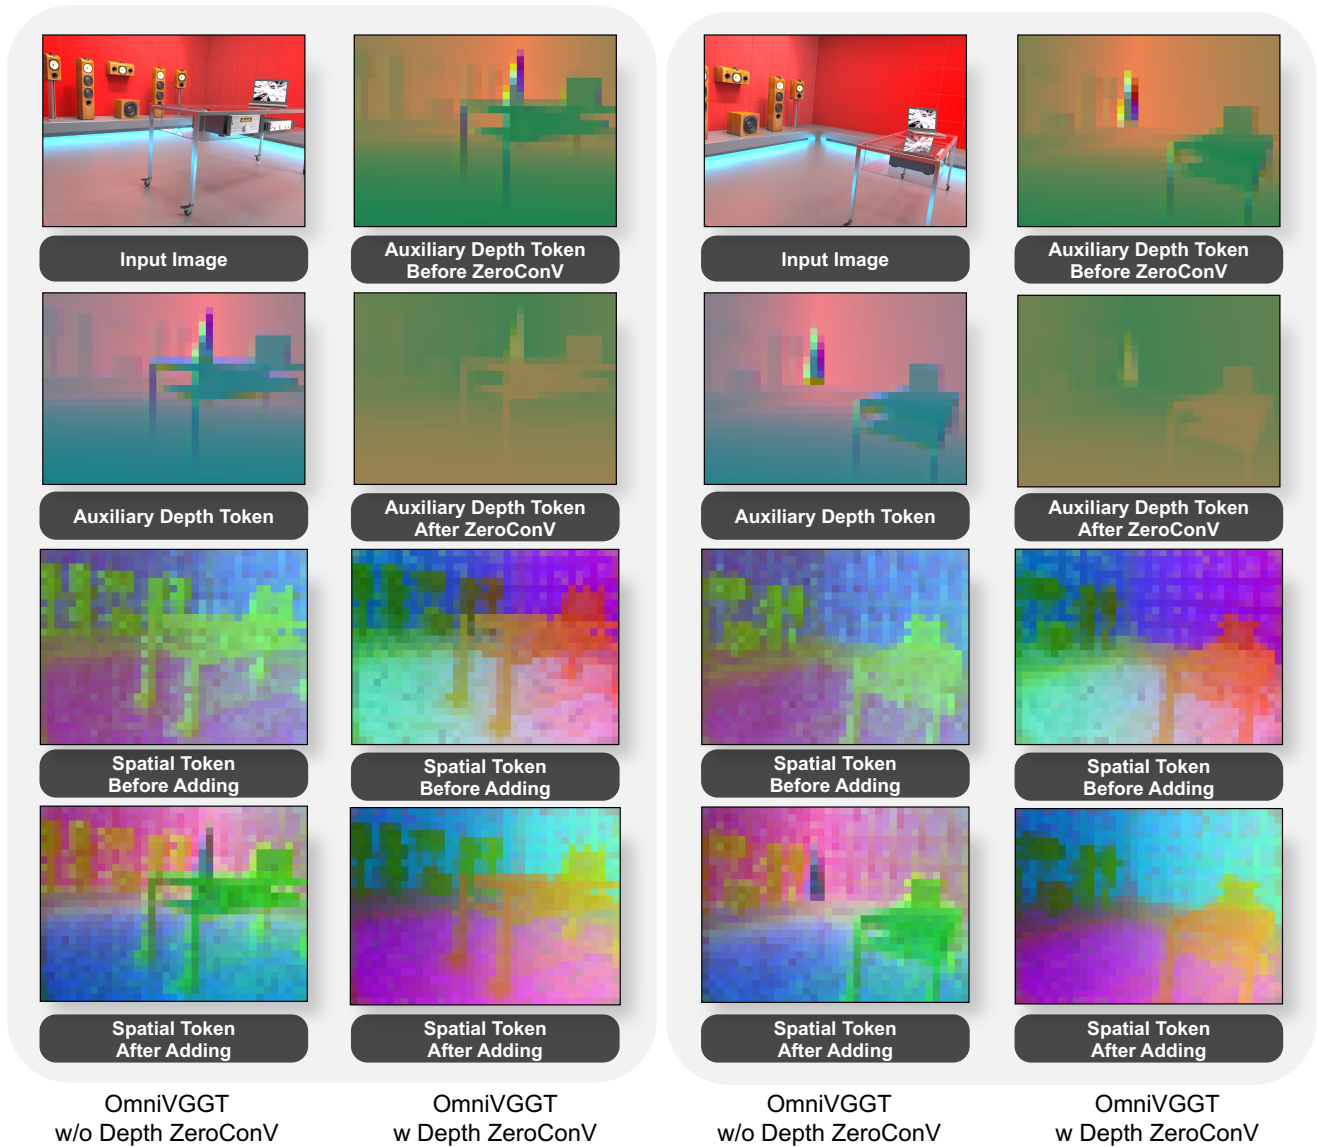

Figure 8. **Feature Map Visualization Comparison Between OmniVGGT and OmniVGGT w/ Depth ZeroConV.** **Left Column:** OmniVGGT without applying the ZeroConV to the depth adapter. From top to bottom: the input image, the feature map of the auxiliary depth token after passing through the depth encoder; the spatial token feature map obtained from the image after the DINO encoder; and the spatial token feature map after adding the auxiliary depth tokens. **Right Column:** OmniVGGT with the ZeroConV applied to the auxiliary depth information. From top to bottom: the auxiliary depth token feature map before and after the ZeroConV; and the spatial token feature maps before and after the addition of auxiliary depth tokens.

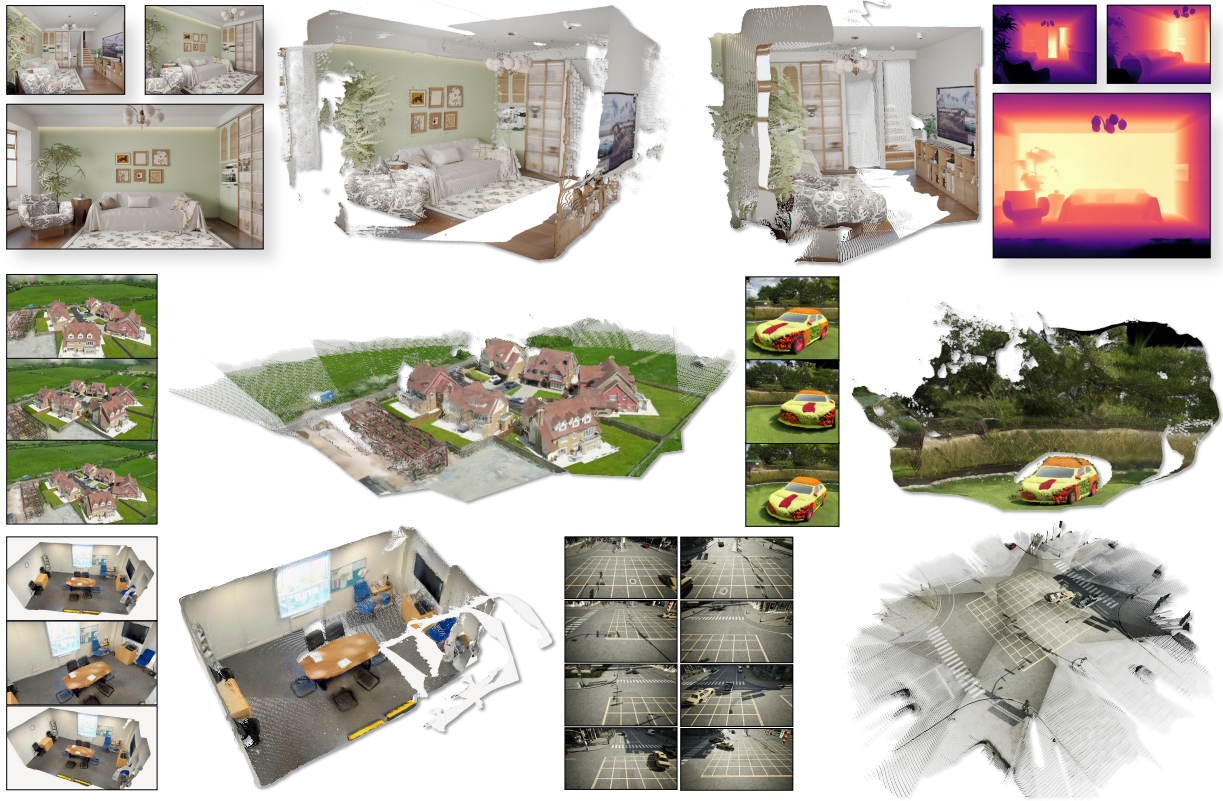

Figure 9. Feed-Forward 3D Point Map by OmniVGGT with In-The-Wild Inputs.

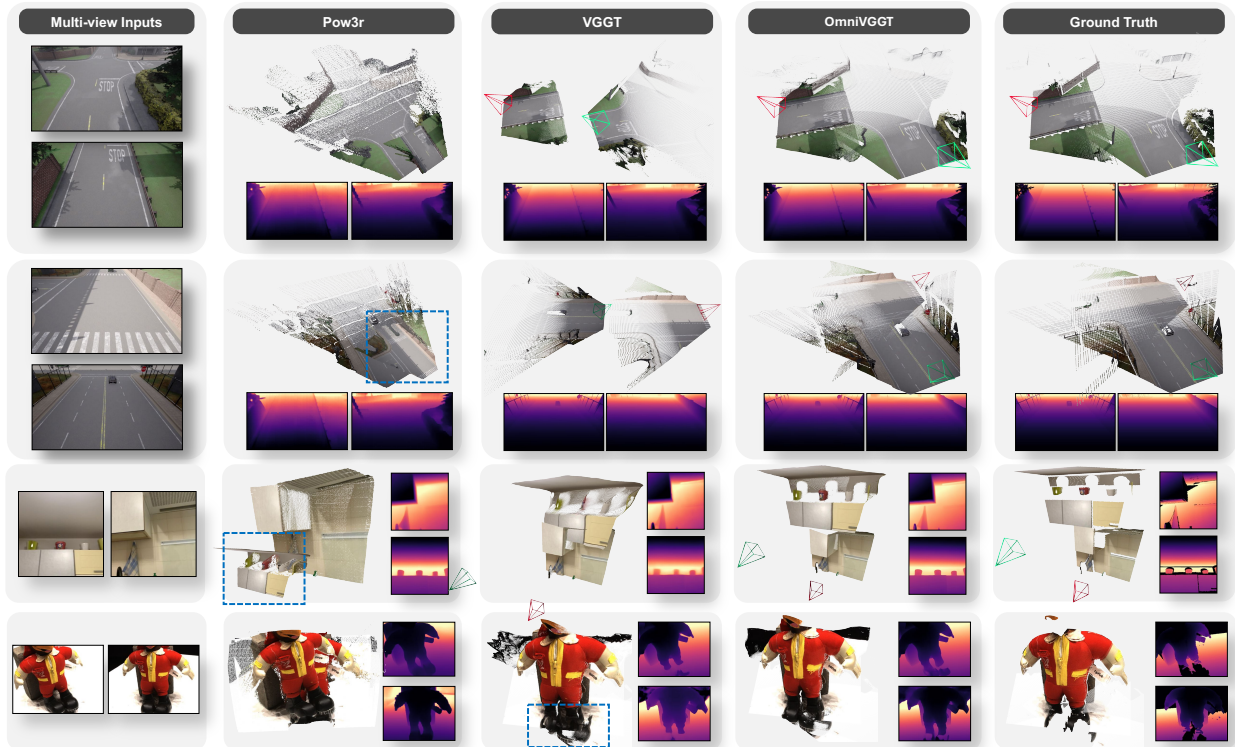

Figure 10. More Visualizations on Image Pairs Input.

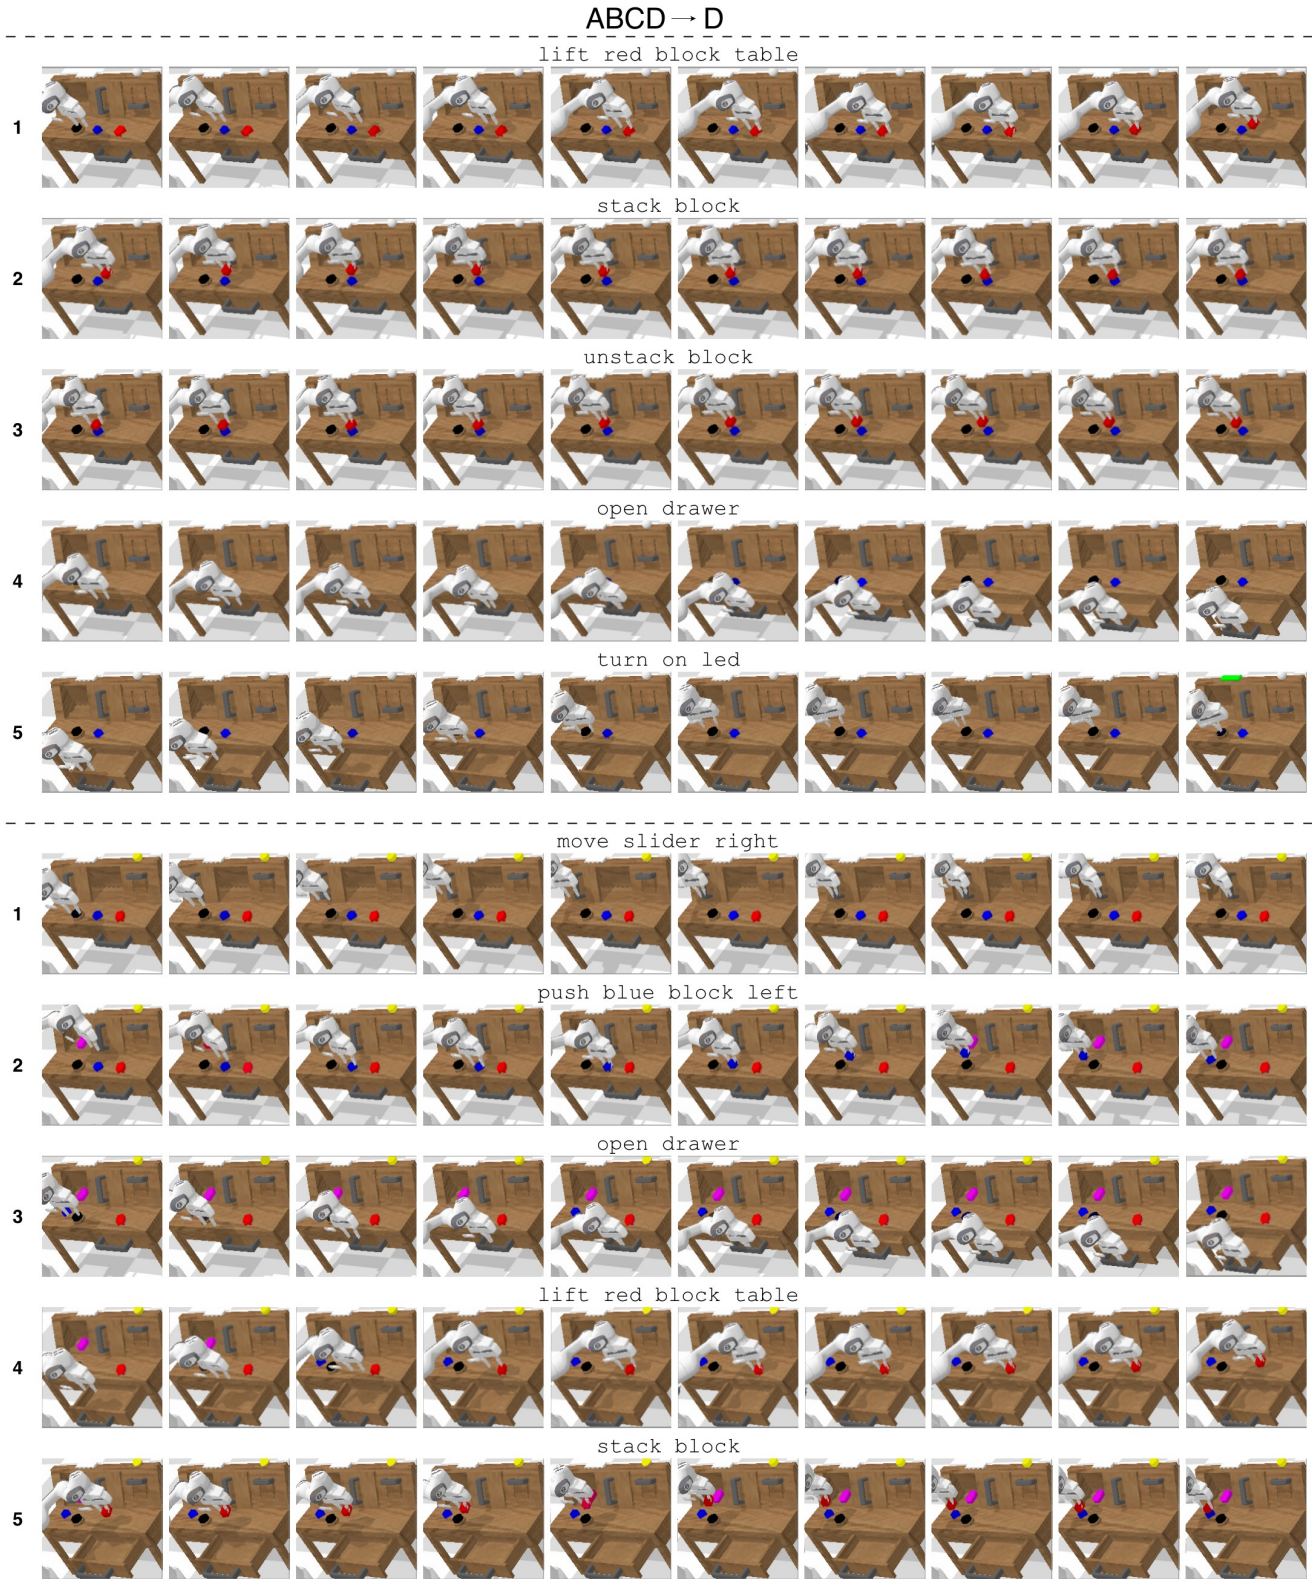

Figure 11. Ours Rollouts on the ABCD→D split of the CALVIN benchmark.

Table 15. The main performance comparison of OmniVGGT and mapanything [24] on the Sintel [6] datasets.

| Method                            | Aux. information |        | Depth                |                          | Camera                  |                          |                          |
|-----------------------------------|------------------|--------|----------------------|--------------------------|-------------------------|--------------------------|--------------------------|
|                                   | Depth            | Camera | Abs Rel $\downarrow$ | $\delta < 1.25 \uparrow$ | RRA@5 $^\circ \uparrow$ | RTA@ 5 $^\circ \uparrow$ | AUC@30 $^\circ \uparrow$ |
| VGGT                              | X                | X      | 0.722                | 70.81                    | 95.69                   | 53.92                    | 70.55                    |
| MapAnything                       | X                | X      | <b>0.348</b>         | 68.87                    | 89.20                   | 30.19                    | 52.80                    |
| OmniVGGT                          | X                | X      | 0.558                | <b>71.46</b>             | <b>96.15</b>            | <b>54.01</b>             | <b>70.83</b>             |
| OmniVGGT +<br>aux. information    | ✓                | X      | 0.106                | 85.95                    | 96.93                   | 59.73                    | 77.16                    |
|                                   | X                | ✓      | 0.553                | 72.36                    | 99.97                   | 75.83                    | 85.35                    |
|                                   | ✓                | ✓      | 0.106                | 85.95                    | 99.97                   | 76.33                    | 85.99                    |
| MapAnything +<br>aux. information | ✓                | X      | 0.108                | 87.90                    | 90.87                   | 42.09                    | 63.37                    |
|                                   | X                | ✓      | 0.305                | 70.99                    | 100                     | 89.88                    | 93.00                    |
|                                   | ✓                | ✓      | <b>0.100</b>         | <b>87.92</b>             | <b>100</b>              | <b>77.68</b>             | <b>88.42</b>             |

Table 16. The main performance comparison of OmniVGGT and mapanything [24] on the CO3D [48] (Object-Centric) datasets.

| Method                            | Aux. information |        | Depth                |                          | Camera                  |                          |                          |
|-----------------------------------|------------------|--------|----------------------|--------------------------|-------------------------|--------------------------|--------------------------|
|                                   | Depth            | Camera | Abs Rel $\downarrow$ | $\delta < 1.25 \uparrow$ | RRA@5 $^\circ \uparrow$ | RTA@ 5 $^\circ \uparrow$ | AUC@30 $^\circ \uparrow$ |
| VGGT                              | X                | X      | 0.048                | 95.68                    | 97.73                   | 78.82                    | 88.24                    |
| MapAnything                       | X                | X      | 0.127                | 88.18                    | 68.48                   | 36.52                    | 60.50                    |
| OmniVGGT                          | X                | X      | <b>0.048</b>         | <b>96.58</b>             | <b>97.42</b>            | <b>80.07</b>             | <b>88.38</b>             |
| OmniVGGT +<br>aux. information    | ✓                | X      | 0.026                | 98.21                    | 97.13                   | 91.15                    | 92.81                    |
|                                   | X                | ✓      | 0.042                | 96.94                    | 98.98                   | 93.16                    | 95.43                    |
|                                   | ✓                | ✓      | <b>0.026</b>         | <b>98.20</b>             | <b>98.89</b>            | <b>94.24</b>             | <b>96.13</b>             |
| MapAnything +<br>aux. information | ✓                | X      | 0.040                | 97.84                    | 84.49                   | 58.50                    | 72.57                    |
|                                   | X                | ✓      | 0.134                | 81.44                    | 96.09                   | 81.89                    | 89.48                    |
|                                   | ✓                | ✓      | 0.029                | 98.08                    | 99.44                   | 89.20                    | 93.40                    |
